# Supplementary material for: Diversity, Regeneration Potential, and Natural Restoration of Miombo along an Anthropization Gradient in the Rural Area of Lubumbashi (Upper-Katanga, D.R. Congo)
Source: Preprints.org preprint supplement (doi:10.20944/preprints202406.0754.v1), 2024-06-12
Supplement: Supplementary file 1 [file supplementary]

**Appendix 1.** Floristic list of regenerative plant species, relative frequency/density and natural regeneration index for each habitat. The species list is presented in alphabetical order. AUF: Unexploited forests, DFO: Degraded forests, FAL: Post-cultivation fallows. NRI: Natural regeneration index (ratio between juveniles and adults), dbh < 1 cm: Seedlings, 1 cm ≤ dbh < 10 cm: Saplings, - : Species not inventoried, n= sample size. RF (Relative Frequency) and RD (Relative Density) values are expressed in percentage.

| **Species** | **Family** |  | **dbh<1cm** | | | | | | | | |  | | **1 cm≤dbh<10 cm** | | | | | | | | |
| --- | --- | --- | --- | --- | --- | --- | --- | --- | --- | --- | --- | --- | --- | --- | --- | --- | --- | --- | --- | --- | --- | --- |
|  | **AUF (n=6628)** | | | **DFO (n=6660)** | | | **FAL (n=4676)** | | |  | | **AUF (n=948)** | | | **DFO (n=2384)** | | | **FAL (n=1756)** | | |
|  | **FR** | **DR** | **IRN** | **FR** | **DR** | **IRN** | **FR** | **DR** | **IRN** | |  | **FR** | **DR** | **IRN** | **FR** | **DR** | **IRN** | **FR** | **DR** | **IRN** |
| Acacia hockii De Wild. | Fabaceae |  | - | - | 0.00 | 0.31 | 0.06 | - | 0.39 | 0.09 | - | |  | - | - | 0.00 | - | - | 0.00 | - | - | 0.00 |
| Albizia adianthifolia (Schumach.) W. Wight | Fabaceae |  | 4.17 | 6.76 | 7.47 | 4.62 | 9.01 | 3.13 | 5.50 | 5.39 | 3.94 | |  | 4.86 | 3.38 | 0.53 | 5.17 | 6.71 | 0.83 | 5.54 | 5.47 | 1.50 |
| Albizia antunesiana Harms | Fabaceae |  | 4.17 | 4.16 | 5.75 | 3.08 | 2.52 | 3.23 | 5.11 | 3.25 | 12.67 | |  | 2.78 | 1.69 | 0.33 | 4.13 | 1.85 | 0.85 | 4.54 | 6.15 | 9.00 |
| Albizia versicolor Welw. ex Oliv. | Fabaceae |  | 1.04 | 0.97 | 8.00 | 0.62 | 0.12 | 0.33 | 0.39 | 0.17 | 0.33 | |  | 0.69 | 0.42 | 0.50 | 1.55 | 1.68 | 1.67 | 2.02 | 2.05 | 1.50 |
| Allophylus africanus P. Beauv. | [Sapindaceae](https://www.zambiaflora.com/speciesdata/family.php?family_id=204) |  | - | - | 0.00 | 0.31 | 0.12 | - | 1.18 | 1.03 | - | |  | - | - | 0.00 | - | - | 0.00 | - | - | 0.00 |
| Anisophyllea boehmii Engl. | [Anisophylleaceae](https://www.zambiaflora.com/speciesdata/family.php?family_id=305) |  | 3.13 | 1.39 | 4.60 | 2.77 | 2.88 | 12.00 | 1.97 | 1.71 | 10.00 | |  | 3.47 | 2.95 | 1.40 | 2.07 | 0.67 | 1.00 | 7.06 | 3.19 | 7.00 |
| Annona senegalensis Pers. | Annonaceae |  | 0.35 | 0.12 | - | - | - | 0.00 | 0.79 | 0.17 | 1.00 | |  | - | - | 0.00 | - | - | 0.00 | 1.51 | 1.37 | 3.00 |
| Azanza garckeana (F. Hoffm.) Exell & Hillc. | Malvaceae |  | - | - | 0.00 | - | - | 0.00 | 0.39 | 0.09 | 0.33 | |  | - | - | 0.00 | - | - | 0.00 | 1.01 | 0.91 | 1.33 |
| Baphia bequaertii De Wild. | Fabaceae |  | 5.56 | 7.91 | 5.95 | 4.31 | 5.29 | 4.19 | 5.11 | 6.50 | 12.67 | |  | 3.47 | 3.38 | 0.36 | 5.68 | 5.70 | 1.62 | 3.53 | 7.06 | 5.17 |
| Bobgunnia madagascariensis (Desv.) J.H. Kirkbr. & Wiersama | Fabaceae |  | 0.69 | 0.12 | 0.33 | 1.23 | 0.90 | 7.50 | 0.79 | 0.26 | - | |  | 1.39 | 1.27 | 0.50 | 3.10 | 1.17 | 3.50 | 1.51 | 0.91 | - |
| Boscia mossambicensis Klotzsch | Capparaceae |  | - | - | 0.00 | 0.31 | 0.06 | - | - | - | 0.00 | |  | - | - | 0.00 | - | - | 0.00 | - | - | 0.00 |
| Brachystegia boehmii Taub. | Fabaceae |  | 0.69 | 0.18 | - | **2.16** | 0.54 | - | 0.39 | 0.26 | - | |  | 0.69 | 0.42 | - | 0.52 | 0.17 | - | 0.50 | 0.46 | - |
| Brachystegia longifolia Benth. | Fabaceae |  | 0.35 | 0.06 | - | 0.31 | 0.12 | 1.00 | 0.39 | 0.17 | - | |  | - | - | 0.00 | - | - | 0.00 | 0.50 | 0.23 | - |
| Brachystegia spiciformis Benth. | Fabaceae |  | 5.56 | 12.61 | 1.95 | 4.93 | 13.33 | 3.96 | 6.29 | 10.61 | 7.75 | |  | 10.42 | 15.19 | 0.34 | 6.71 | 5.54 | 0.59 | 6.05 | 7.97 | 2.19 |
| Brachystegia taxifolia Harms | Fabaceae |  | 1.04 | 0.84 | - | 0.62 | 0.12 | - | - | - | 0.00 | |  | - | - | 0.00 | - | - | 0.00 | - | - | 0.00 |
| Brachystegia wangermeeana De Wild. | Fabaceae |  | 4.51 | 10.80 | 1.10 | 4.93 | 20.48 | 4.11 | 5.90 | 27.89 | 10.52 | |  | 6.94 | 17.30 | 0.25 | 6.20 | 29.53 | 2.12 | 7.56 | 23.46 | 3.32 |
| Bridelia duvigneaudii J. Léonard | Phyllanthaceae |  | 2.08 | 0.78 | - | 2.16 | 1.38 | - | 0.79 | 0.26 | - | |  | - | - | 0.00 | - | - | 0.00 | - | - | 0.00 |
| Cassia abbreviata Oliv. | Fabaceae |  | - | - | 0.00 | 0.31 | 0.06 | - | - | - | 0.00 | |  | - | - | 0.00 | - | - | 0.00 | - | - | 0.00 |
| Chrysophyllum bangweolense R.E.Fr. | Sapotaceae |  | - | - | 0.00 | 0.62 | 0.18 | - | - | - | 0.00 | |  | - | - | 0.00 | - | - | 0.00 | 0.50 | 0.23 | - |
| Combretum collinum Fresen. | Combretaceae |  | - | - | 0.00 | - | - | 0.00 | 1.18 | 0.43 | - | |  | - | - | 0.00 | - | - | 0.00 | 1.01 | 0.46 | - |
| Combretum molle R.Br ex G. Don | Combretaceae |  | 2.43 | 1.21 | 10.00 | 0.92 | 0.42 | 2.33 | 3.54 | 3.08 | 18.00 | |  | 0.69 | 0.84 | 1.00 | 1.03 | 0.50 | 1.00 | 1.51 | 1.37 | 3.00 |
| Combretum zeyheri Sond. | Combretaceae |  | - | - | 0.00 | 0.62 | 0.18 | 1.50 | - | - | 0.00 | |  | 0.69 | 0.42 | - | 1.55 | 2.85 | 8.50 | 1.51 | 0.91 | 4.00 |
| Diospyros mweroensis F. White | Ebenaceae |  | - | - | 0.00 | - | - | 0.00 | 0.39 | 0.09 | - | |  | - | - | 0.00 | - | - | 0.00 | - | - | 0.00 |
| Diplorhynchus condylocarpon (Müll. Arg.) Pichon | Apocynaceae |  | 2.78 | 2.96 | 4.90 | 4.31 | 2.46 | 1.37 | 1.18 | 0.86 | 1.67 | |  | 3.47 | 5.91 | 1.40 | **5.68** | 8.39 | 1.67 | 2.02 | 1.82 | 1.33 |
| Ekebergia benguelensis Welw. ex C.DC. | Meliaceae |  | 2.08 | 0.54 | 9.00 | 1.54 | 0.36 | 6.00 | 2.36 | 1.45 | - | |  | - | - | 0.00 | 1.55 | 0.50 | 3.00 | 2.02 | 1.14 | - |
| Erythrophleum africanum (Welw. ex Benth.) Harms | Fabaceae |  | 2.08 | 0.66 | 1.57 | 1.85 | 0.54 | 1.29 | - | - | 0.00 | |  | 2.08 | 1.27 | 0.43 | 2.07 | 0.67 | 0.57 | 0.50 | 0.23 | 0.33 |
| Faurea rochetiana (A. Rich.) Pic.Serm. | Proteaceae |  | 0.69 | 0.18 | - | - | 0.12 | 1.00 | - | - | 0.00 | |  | - | - | 0.00 | 0.52 | 0.34 | 1.00 | - | - | 0.00 |
| Ficus sp | Moraceae |  | - | - | 0.00 | - | - | 0.00 | - | - | 0.00 | |  | 0.69 | 0.42 | - | - | - | 0.00 | 0.50 | 0.23 | - |
| Ficus thonningii Blume | Moraceae |  | 0.35 | 0.06 | - | - | - | 0.00 | - | - | 0.00 | |  | 0.69 | 0.42 | - | - | - | 0.00 | - | - | 0.00 |
| Garcinia huillensis Oliv. | Clusiaceae |  | **3.13** | 1.15 | - | 2.16 | 0.48 | 4.00 | 1.57 | 0.34 | 4.00 | |  | - | - | 0.00 | - | - | 0.00 | 0.50 | 0.23 | 1.00 |
| Gardenia ternifolia Schumach. & Thonn. | Rubiaceae |  | - | - | 0.00 | - | - | 0.00 | - | - | 0.00 | |  | - | - | 0.00 | - | - | 0.00 | 0.50 | 0.23 | - |
| Haplocoelum foliolosum (Hiern) Bullock | Sapindaceae |  | 0.35 | 0.06 | - | 0.62 | 0.12 | - | 1.18 | 0.26 | - | |  | - | - | 0.00 | - | - | 0.00 | - | - | 0.00 |
| Harungana madagascariensis Lam. ex Poir. | Clusiaceae |  | 1.04 | 0.36 | - | **2.77** | 2.04 | 34.00 | 1.57 | 1.28 | - | |  | - | - | 0.00 | - | - | 0.00 | 1.01 | 0.46 | - |
| Hexalobus monopetalus (A. Rich.) Engl. & Diels | Annonaceae |  | - | - | 0.00 | 0.92 | 0.24 | - | 0.39 | 0.09 | - | |  | 1.39 | 0.84 | - | 1.03 | 0.34 | - | 0.50 | 0.23 | - |
| Hymenocardia acida Tul. | Phyllanthaceae |  | - | - | 0.00 | 1.23 | 1.26 | 10.50 | 1.18 | 5.99 | - | |  | 0.69 | 0.42 | - | 1.55 | 1.34 | 4.00 | 1.01 | 0.46 | - |
| Isoberlinia angolensis (Benth.) Hoyle & Brenan | Fabaceae |  | 3.82 | 11.04 | 11.44 | 4.62 | 5.23 | 9.67 | 3.54 | 4.53 | 10.60 | |  | 4.86 | 2.95 | 0.44 | 2.07 | 4.53 | 3.00 | 3.53 | 6.61 | 5.80 |
| Isoberlinia tomentosa (Harms) Craib & Stapf | Fabaceae |  | 0.35 | 0.18 | - | - | - | 0.00 | - | - | 0.00 | |  | - | - | 0.00 | **4.13** | 4.53 | 5.40 | 2.02 | 2.28 | 2.00 |
| Julbernardia globiflora (Benth.) Troupin | Fabaceae |  | - | - | 0.00 | 0.31 | 0.42 | 7.00 | 0.79 | 0.17 | - | |  | - | - | 0.00 | - | - | 0.00 | - | - | 0.00 |
| Julbernardia paniculata (Benth.) Troupin | Fabaceae |  | 0.69 | 0.12 | 0.40 | **1.85** | 1.44 | 6.00 | - | - | 0.00 | |  | 0.69 | 0.84 | 0.40 | 1.55 | 0.67 | 1.00 | 1.01 | 1.14 | 5.00 |
| Landolphia kirkii Dyer ex Hook. f. | Apocynaceae |  | 0.35 | 0.06 | - | 0.31 | 0.66 | - | - | - | 0.00 | |  | 0.69 | 0.84 | - | - | - | 0.00 | - | - | 0.00 |
| Lannea discolor (Sond.) Angl. | Anacardiaceae |  | 0.69 | 0.18 | 0.75 | 1.23 | 0.96 | 1.33 | 0.39 | 0.17 | - | |  | 1.39 | 0.84 | 0.50 | 3.10 | 1.17 | 0.58 | 2.52 | 1.59 | - |
| Markhamia obtusifolia (Boulanger) Sprague | Bignoniaceae |  | 0.35 | 0.12 | 0.67 | 1.23 | 0.66 | 11.00 | 1.97 | 1.20 | - | |  | 1.39 | 0.84 | 0.67 | 1.03 | 1.01 | 6.00 | - | - | 0.00 |
| Marquesia macroura Gilg | Dipterocarpaceae |  | 0.69 | 0.36 | 0.26 | 2.46 | 1.02 | 0.94 | 1.18 | 1.11 | - | |  | 2.78 | 2.11 | 0.22 | 1.55 | 0.67 | 0.22 | - | - | 0.00 |
| Monotes africanus A. DC. | Dipterocarpaceae |  | 0.35 | 0.06 | 1.00 | 0.62 | 0.18 | - | - | - | 0.00 | |  | - | - | 0.00 | 1.55 | 0.50 | - | - | - | 0.00 |
| Monotes katangensis (De Wild.) De Wild. | Dipterocarpaceae |  | 1.39 | 0.54 | 0.75 | 1.54 | 1.20 | 4.00 | 0.39 | 0.09 | - | |  | 3.47 | 3.38 | 0.67 | 1.03 | 0.84 | 1.00 | 0.50 | 0.23 | - |
| Multidentia crassa (Hiern) Bridson | Rubiaceae |  | - | - | 0.00 | - | - | 0.00 | - | - | 0.00 | |  | - | - | 0.00 | - | - | 0.00 | 0.50 | 0.23 | - |
| Mystroxylon aethiopicum (Thunb.) Lœs. | Celastraceae |  | 0.69 | 0.24 | 4.00 | 0.92 | 0.90 | 15.00 | 0.39 | 0.09 | - | |  | - | - | 0.00 | 1.03 | 0.50 | 3.00 | - | - | 0.00 |
| Ochna schweinfurthiana F. Hoffm. | Ochnaceae |  | 4.17 | 3.02 | 8.33 | 3.69 | 3.78 | 63.00 | 3.93 | 2.65 | 15.50 | |  | 4.17 | 2.53 | 1.00 | 3.10 | 2.18 | 13.00 | 1.51 | 0.91 | 2.00 |
| Olax obtusifolia De Wild. | Olacaceae |  | 0.69 | 0.24 | 4.00 | 0.92 | 0.18 | - | - | - | 0.00 | |  | **3.47** | 2.53 | 6.00 | - | - | 0.00 | - | - | 0.00 |
| Oldfieldia dactylophylla (Welw. ex Oliv.) Léonard | Euphorbiaceae |  | - | - | 0.00 | 0.31 | 0.12 | - | - | - | 0.00 | |  | - | - | 0.00 | - | - | 0.00 | - | - | 0.00 |
| Parinari curatellifolia Planch. ex Benth. | Chrysobalanaceae |  | 1.74 | 0.48 | 1.33 | 1.85 | 0.84 | 0.88 | 1.57 | 0.86 | 2.50 | |  | 2.08 | 1.27 | 0.50 | 4.13 | 3.69 | 1.38 | 3.53 | 2.96 | 3.25 |
| Pericopsis angolensis (Baker) Meeuwen | Fabaceae |  | 2.08 | 3.50 | 5.27 | 1.23 | 1.02 | 2.43 | 0.39 | 0.26 | - | |  | 1.39 | 1.27 | 0.27 | 1.55 | 1.01 | 0.86 | 0.50 | 0.23 | - |
| Philenoptera katangensis (De Wild.) Schrire | Fabaceae |  | - | - | 0.00 | 0.31 | 0.18 | - | - | - | 0.00 | |  | - | - | 0.00 | 0.52 | 0.17 | - | 0.50 | 0.23 | - |
| Phyllanthus muellerianus (Kuntze) Exell | Phyllanthaceae |  | - | - | 0.00 | - | - | 0.00 | **1.97** | 0.60 | 7.00 | |  | - | - | 0.00 | 0.52 | 0.17 | - | 0.50 | 0.23 | 1.00 |
| Phyllocosmus lemaireanus (De Wild. & T. Durand) T. Durand & H. Durand | Ixonanthaceae |  | 2.78 | 2.41 | 8.00 | 3.08 | 2.58 | 10.75 | 3.93 | 1.97 | 23.00 | |  | 2.78 | 2.53 | 1.20 | 2.58 | 1.01 | 1.50 | 0.50 | 0.23 | 1.00 |
| Piliostigma thonningii (Schumach.) Milne-Redh. | Fabaceae |  | - | - | 0.00 | - | - | 0.00 | - | - | 0.00 | |  | 0.69 | 0.42 | - | - | - | 0.00 | 1.01 | 0.46 | - |
| Protea angolensis Welw. | Proteaceae |  | - | - | 0.00 | 0.62 | 0.84 | - | 0.39 | 0.09 | - | |  | - | - | 0.00 | - | - | 0.00 | - | - | 0.00 |
| Pseudolachnostylis maprouneifolia Pax | Phyllanthaceae |  | 2.78 | 2.35 | 19.50 | 3.39 | 1.80 | 4.29 | 3.14 | 1.80 | 10.50 | |  | 2.08 | 2.53 | 3.00 | 2.07 | 1.01 | 0.86 | **5.04** | 3.19 | 7.00 |
| Psorospermum febrifugum Spach | Clusiaceae |  | **4.51** | 4.47 | 74.00 | 2.77 | 2.04 | 17.00 | 4.32 | 1.88 | - | |  | - | - | 0.00 | 1.03 | 0.34 | 1.00 | 3.02 | 1.37 | - |
| Pterocarpus angolensis DC. | Fabaceae |  | 0.35 | 0.06 | 0.07 | - | - | 0.00 | 0.39 | 0.17 | 0.40 | |  | 5.56 | 5.49 | 0.93 | 3.10 | 1.17 | 0.88 | 3.02 | 1.59 | 1.40 |
| Pterocarpus tinctorius Welw. | Fabaceae |  | 1.74 | 1.93 | - | 0.92 | 0.18 | 3.00 | 0.39 | 0.09 | - | |  | 0.69 | 0.42 | - | - | - | 0.00 | - | - | 0.00 |
| Rothmannia engleriana (K. Schum.) Keay | Rubiaceae |  | 3.82 | 2.53 | - | 2.16 | 1.50 | - | 4.72 | 3.25 | 38.00 | |  | 1.39 | 0.84 | - | - | - | 0.00 | 1.01 | 0.46 | 2.00 |
| Salacia rhodesiaca Blakelock | Celastraceae |  | 2.43 | 3.86 | - | 1.85 | 0.66 | - | 0.39 | 0.26 | - | |  | 1.39 | 1.27 | - | - | - | 0.00 | - | - | 0.00 |
| Schrebera trichoclada Welw. | Oleaceae |  | 0.69 | 0.12 | - | - | - | 0.00 | 1.57 | 0.60 | 7.00 | |  | - | - | 0.00 | - | - | 0.00 | 1.51 | 1.59 | 7.00 |
| Steganotaenia araliacea Hochst. | Apiaceae |  | 0.69 | 0.36 | - | - | - | 0.00 | 0.39 | 0.17 | - | |  | - | - | 0.00 | - | - | 0.00 | - | - | 0.00 |
| Sterculia quinqueloba (Garcke) K. Schum. | Malvaceae |  | - | - | 0.00 | - | - | 0.00 | - | - | 0.00 | |  | - | - | 0.00 | - | - | 0.00 | 0.50 | 0.23 | 0.50 |
| Strychnos cocculoides Boulanger | Loganiaceae |  | 0.35 | 0.06 | 0.33 | 1.54 | 0.42 | 7.00 | 1.97 | 1.37 | 16.00 | |  | 2.08 | 1.27 | 1.00 | 1.55 | 0.67 | 4.00 | 1.51 | 0.68 | 3.00 |
| Strychnos pungens Soler. | Loganiaceae |  | - | - | 0.00 | - | - | 0.00 | 0.39 | 0.09 | - | |  | - | - | 0.00 | - | - | 0.00 | - | - | 0.00 |
| Strychnos sp | Loganiaceae |  | - | - | 0.00 | 1.23 | 0.42 | 7.00 | 1.18 | 0.26 | 3.00 | |  | 1.39 | 0.84 | 0.67 | - | - | 0.00 | 0.50 | 0.23 | 1.00 |
| Strychnos spinosa Lam. | Loganiaceae |  | - | - | 0.00 | - | - | 0.00 | 0.39 | 0.09 | - | |  | 0.69 | 0.42 | 1.00 | 1.03 | 0.50 | - | 1.51 | 0.68 | - |
| Syzygium guineense (Willd.) DC. subsp. macrocarpum | Myrtaceae |  | 3.13 | 1.03 | - | 1.23 | 0.48 | 2.67 | 2.75 | 1.97 | 4.60 | |  | 1.39 | 0.84 | - | 1.55 | 1.01 | 2.00 | 3.53 | 2.05 | 1.80 |
| Terminalia mollis M.A. Lawson | Combretaceae |  | - | - | 0.00 | - | - | 0.00 | - | - | 0.00 | |  | - | - | 0.00 | - | - | 0.00 | 0.50 | 0.23 | - |
| Uapaca benguelensis Müll.Arg. | Phyllanthaceae |  | 2.08 | 1.57 | - | 1.54 | 1.14 | 9.50 | - | - | 0.00 | |  | - | - | 0.00 | - | - | 0.00 | - | - | 0.00 |
| Uapaca kirkiana Müll. Arg. | Phyllanthaceae |  | **4.51** | 3.14 | 3.25 | 2.46 | 2.70 | 1.61 | 0.79 | 0.34 | 1.00 | |  | 4.17 | 3.80 | 0.56 | 3.62 | 2.35 | 0.50 | 2.02 | 1.37 | 1.50 |
| Uapaca nitida Müll. Arg. | Phyllanthaceae |  | 1.74 | 1.39 | 2.88 | 0.62 | 0.12 | 0.18 | 1.18 | 0.34 | 4.00 | |  | 2.08 | 2.11 | 0.63 | 1.55 | 0.67 | 0.36 | 1.01 | 0.46 | 2.00 |
| Uapaca pilosa Hutch. | Phyllanthaceae |  | - | - | 0.00 | 0.31 | 0.06 | - | - | - | 0.00 | |  | - | - | 0.00 | - | - | 0.00 | - | - | 0.00 |
| Uapaca robynsii De Wild. | Phyllanthaceae |  | 1.04 | 0.42 | 2.33 | - | - | 0.00 | - | - | 0.00 | |  | 1.39 | 0.84 | 0.67 | 1.55 | 0.50 | - | - | - | 0.00 |
| Vitex doniana Sweet | Lamiaceae |  | 0.35 | 0.06 | 1.00 | 0.62 | 0.18 | 0.60 | 0.79 | 0.34 | 1.33 | |  | 0.69 | 0.42 | 1.00 | 1.03 | 0.34 | 0.40 | 2.02 | 1.14 | 1.67 |
| Vitex fischeri Gürke | Lamiaceae |  | - | - | 0.00 | - | - | 0.00 | - | - | 0.00 | |  | - | - | 0.00 | 0.52 | 0.17 | 0.14 | - | - | 0.00 |
| Vitex madiensis Oliv. | Lamiaceae |  | 0.35 | 0.06 | - | 0.92 | 0.42 | - | 1.97 | 0.68 | - | |  | - | - | 0.00 | - | - | 0.00 | 0.50 | 0.23 | - |
| Vitex mombassae Vatke | Lamiaceae |  | 0.35 | 0.12 | - | 0.62 | 0.12 | 2.00 | 1.97 | 0.77 | - | |  | - | - | 0.00 | 1.55 | 0.67 | 4.00 | - | - | 0.00 |
| Zanha africana (Radlk.) Exell | Sapindaceae |  | - | - | 0.00 | 0.31 | 0.12 | - | 0.39 | 0.09 | - | |  | - | - | 0.00 | - | - | 0.00 | - | - | 0.00 |
